# Supplementary material
Source: PubMed Central journal article supplement (PMC3886660)
Supplement: supp_M041038_jlr.M041038-1.pdf [file supp_M041038_jlr.M041038-1.pdf]

Supplemental table: Proteins identified in pre $\beta$ 1-HDL purified from human plasma

| Reference                                                                                                             | P (pro)  | Sf    | Score | Coverage | MW    | Accession | Peptide (Hits)  |
|-----------------------------------------------------------------------------------------------------------------------|----------|-------|-------|----------|-------|-----------|-----------------|
| A Chain A, Crystal Structure Of Lipid-Free Human Apolipoprotein A-I                                                   | 1.45E-08 | 15.72 | 190.3 | 71.6     | 28078 | 90108664  | 20 (20 0 0 0 0) |
| B Chain B, Crystal Structure Of Lipid-Free Human Apolipoprotein A-I                                                   | 1.45E-08 | 15.72 | 190.3 | 71.6     | 28078 | 90108665  | 20 (20 0 0 0 0) |
| C Chain C, Crystal Structure Of Lipid-Free Human Apolipoprotein A-I                                                   | 1.45E-08 | 15.72 | 190.3 | 71.6     | 28078 | 90108666  | 20 (20 0 0 0 0) |
| unnamed protein product [Homo sapiens] (Human apoA-1 mutein)                                                          | 1.45E-08 | 15.72 | 190.3 | 72.2     | 27796 | 215415640 | 20 (20 0 0 0 0) |
| unnamed protein product [Homo sapiens] (Human apoA-1 mutein)                                                          | 1.45E-08 | 15.72 | 190.3 | 71.6     | 27972 | 215415648 | 20 (20 0 0 0 0) |
| unnamed protein product [Homo sapiens] (Human apoA-1 mutein)                                                          | 1.45E-08 | 15.72 | 190.3 | 71.6     | 27972 | 215415656 | 20 (20 0 0 0 0) |
| unnamed protein product [Homo sapiens] (Human apoA-1 mutein)                                                          | 1.45E-08 | 15.72 | 190.3 | 71.6     | 27972 | 15415644  | 20 (20 0 0 0 0) |
| unnamed protein product [Homo sapiens] (Human apoA-1 mutein)                                                          | 1.45E-08 | 15.72 | 190.3 | 71.6     | 28078 | 215415678 | 20 (20 0 0 0 0) |
| unnamed protein product [Homo sapiens] (Human apoA-1 mutein)                                                          | 1.45E-08 | 15.72 | 190.3 | 71.6     | 28025 | 215415636 | 20 (20 0 0 0 0) |
| apolipoprotein A-I preproprotein [Homo sapiens]                                                                       | 1.45E-08 | 15.72 | 190.3 | 65.2     | 30778 | 4557321   | 20 (20 0 0 0 0) |
| unnamed protein product [Homo sapiens] (Human apoA-1 mutein)                                                          | 1.45E-08 | 15.72 | 190.3 | 71.6     | 28025 | 215415624 | 20 (20 0 0 0 0) |
| APOA1_HUMAN RecName: Full=Apolipoprotein A-I; Short=Apo-AI; Short=ApoA-I; Alt preproapolipoprotein A-I [Homo sapiens] | 1.45E-08 | 15.72 | 190.3 | 65.2     | 30778 | 113992    | 20 (20 0 0 0 0) |
| proapolipoprotein [Homo sapiens] (Recombinant apoA-1)                                                                 | 1.45E-08 | 15.72 | 190.3 | 65.2     | 30778 | 178768    | 20 (20 0 0 0 0) |
| unnamed protein product [Homo sapiens] (Human apoA-1 mutein)                                                          | 1.45E-08 | 15.72 | 190.3 | 65.2     | 30778 | 178773    | 20 (20 0 0 0 0) |
| Apolipoprotein A-I [Homo sapiens]                                                                                     | 1.45E-08 | 15.72 | 190.3 | 65.2     | 30778 | 158257894 | 20 (20 0 0 0 0) |
| apolipoprotein A-I precursor variant 5 [Homo sapiens]                                                                 | 1.45E-08 | 15.72 | 190.3 | 65.2     | 30778 | 13529242  | 20 (20 0 0 0 0) |
| apolipoprotein A-I precursor variant 4 [Homo sapiens]                                                                 | 1.45E-08 | 15.72 | 190.3 | 65.2     | 30778 | 167887486 | 20 (20 0 0 0 0) |
| apolipoprotein A-I precursor variant 3 [Homo sapiens]                                                                 | 1.45E-08 | 15.72 | 190.3 | 65.2     | 30778 | 167887485 | 20 (20 0 0 0 0) |
| unnamed protein product [Homo sapiens] (Human apoA-1 mutein)                                                          | 1.45E-08 | 14.86 | 180.3 | 66.3     | 28025 | 167887484 | 20 (20 0 0 0 0) |
| apolipoprotein A-I precursor variant 2 [Homo sapiens]                                                                 | 1.45E-08 | 14.78 | 180.3 | 61.0     | 30778 | 215415626 | 19 (19 0 0 0 0) |
| unnamed protein product [Homo sapiens] (Human apoA-1 mutein)                                                          | 1.45E-08 | 14.12 | 170.3 | 63.4     | 27972 | 167887483 | 19 (19 0 0 0 0) |
| unnamed protein product [Homo sapiens] (Human apoA-1 mutein)                                                          | 1.45E-08 | 14.12 | 170.3 | 63.4     | 27972 | 215415630 | 18 (18 0 0 0 0) |
| unnamed protein product [Homo sapiens] (Human apoA-1 mutein)                                                          | 1.45E-08 | 14.12 | 170.3 | 63.4     | 27972 | 215415658 | 18 (18 0 0 0 0) |
| unnamed protein product [Homo sapiens] (Human apoA-1 mutein)                                                          | 1.45E-08 | 14.12 | 170.3 | 63.4     | 27972 | 215415646 | 18 (18 0 0 0 0) |
| unnamed protein product [Homo sapiens] (Human apoA-1 mutein)                                                          | 1.35E-08 | 13.95 | 170.3 | 64.6     | 28025 | 215415628 | 18 (18 0 0 0 0) |
| unnamed protein product [Homo sapiens] (Human apoA-1 mutein)                                                          | 1.35E-08 | 13.95 | 170.3 | 64.6     | 27972 | 215415652 | 18 (18 0 0 0 0) |
| unnamed protein product [Homo sapiens] (Human apoA-1 mutein)                                                          | 1.35E-08 | 13.95 | 170.3 | 64.6     | 27972 | 215415650 | 18 (18 0 0 0 0) |
| unnamed protein product [Homo sapiens] (Human apoA-1 mutein)                                                          | 1.35E-08 | 13.95 | 170.3 | 64.6     | 28025 | 215415638 | 18 (18 0 0 0 0) |
| unnamed protein product [Homo sapiens] (Human apoA-1 mutein)                                                          | 1.45E-08 | 13.94 | 170.3 | 66.3     | 28025 | 215415634 | 17 (17 0 0 0 0) |
| unnamed protein product [Homo sapiens] (Human apoA-1 mutein)                                                          | 1.45E-08 | 13.94 | 170.3 | 66.3     | 27972 | 215415660 | 17 (17 0 0 0 0) |
| apolipoprotein A-I precursor variant 1 [Homo sapiens]                                                                 | 1.45E-08 | 13.81 | 170.3 | 55.8     | 30778 | 167887482 | 18 (18 0 0 0 0) |
| unnamed protein product [Homo sapiens] (Human apoA-1 mutein)                                                          | 1.45E-08 | 13.26 | 160.3 | 58.0     | 27972 | 215415632 | 17 (17 0 0 0 0) |
| B Chain B, Crystal Structure Of Human Apolipoprotein A-I                                                              | 9.58E-09 | 12.73 | 150.2 | 69.2     | 23403 | 2914176   | 15 (15 0 0 0 0) |
| A Chain A, Crystal Structure Of Human Apolipoprotein A-I                                                              | 9.58E-09 | 12.73 | 150.2 | 69.2     | 23403 | 2914175   | 15 (15 0 0 0 0) |
| D Chain D, Crystal Structure Of Human Apolipoprotein A-I                                                              | 9.58E-09 | 12.73 | 150.2 | 69.2     | 23403 | 2914178   | 15 (15 0 0 0 0) |
| 0 Chain 0, Structure Of The Ribosome-Secye Complex In The Membrane Environmen (Human apoA-1 fragment)                 | 9.58E-09 | 12.73 | 150.2 | 69.5     | 23272 | 329665991 | 15 (15 0 0 0 0) |
| 1 Chain 1, Structure Of The Ribosome-Secye Complex In The Membrane Environmen (Human apoA-1 fragment)                 | 9.58E-09 | 12.73 | 150.2 | 69.5     | 23272 | 329665992 | 15 (15 0 0 0 0) |
| C Chain C, Crystal Structure Of Human Apolipoprotein A-I                                                              | 9.58E-09 | 12.73 | 150.2 | 69.2     | 23403 | 2914177   | 15 (15 0 0 0 0) |
| unnamed protein product [Homo sapiens] (Human apoA-1 mutein)                                                          | 1.35E-08 | 12.35 | 150.3 | 56.4     | 27972 | 215415654 | 16 (16 0 0 0 0) |
| unnamed protein product [Homo sapiens] (Human apoA-1 mutein)                                                          | 1.45E-08 | 12.33 | 150.3 | 58.0     | 27972 | 215415642 | 15 (15 0 0 0 0) |
| proapolipoprotein [Homo sapiens] (Recombinant apoA-1)                                                                 | 9.93E-09 | 10.84 | 130.3 | 48.2     | 28961 | 178775    | 14 (14 0 0 0 0) |
| A Chain A, 2.2 Angstrom Crystal Structure Of C Terminal Truncated Human Apolipoprotein A-1                            | 4.64E-08 | 10.49 | 130.3 | 64.3     | 21624 | 347447518 | 14 (14 0 0 0 0) |
| Apolipoprotein A-I [Homo sapiens]                                                                                     | 3.08E-08 | 6.96  | 80.3  | 30.0     | 30778 | 82571472  | 9 (9 0 0 0 0)   |
| apolipoprotein A-I, isoform CRA_a [Homo sapiens]                                                                      | 3.08E-08 | 6.10  | 70.3  | 25.1     | 30778 | 119587680 | 8 (8 0 0 0 0)   |
| apolipoprotein A-I, isoform CRA_b [Homo sapiens]                                                                      | 3.08E-08 | 4.50  | 50.3  | 23.4     | 23468 | 119587681 | 6 (6 0 0 0 0)   |
| apolipoprotein A-I, isoform CRA_a [Homo sapiens]                                                                      | 3.08E-08 | 4.33  | 50.3  | 18.7     | 30778 | 119587678 | 6 (6 0 0 0 0)   |
| apolipoprotein A-I, isoform CRA_a [Homo sapiens]                                                                      | 3.08E-08 | 4.33  | 50.3  | 18.7     | 30778 | 119587679 | 6 (6 0 0 0 0)   |
| unnamed protein product [Homo sapiens] (Human apoA-1 mutein)                                                          | 3.08E-08 | 3.38  | 40.2  | 13.9     | 30778 | 732753    | 5 (5 0 0 0 0)   |
| apolipoprotein AI, apo AI [human, spleen, Peptide Mutant, 88 aa]                                                      | 3.08E-08 | 3.00  | 40.2  | 40.9     | 10161 | 253362    | 5 (5 0 0 0 0)   |
| preproapolipoprotein AI [Homo sapiens]                                                                                | 3.08E-08 | 2.53  | 30.2  | 13.9     | 30778 | 28772     | 3 (3 0 0 0 0)   |
| 750843A protein, lipid binding AI (Human apoA-1)                                                                      | 1.35E-08 | 1.92  | 20.2  | 6.9      | 28346 | 229513    | 2 (2 0 0 0 0)   |
| apoA1 [Homo sapiens]                                                                                                  | 6.35E-05 | 1.60  | 20.1  | 8.2      | 28078 | 490098    | 2 (2 0 0 0 0)   |
| A Chain A, The Helix-Hinge-Helix Structural Motif In Human Apolipoprotein A-I                                         | 6.27E-08 | 0.94  | 10.1  | 23.9     | 5142  | 157831263 | 1 (1 0 0 0 0)   |
| A Chain A, The Helix-Hinge-Helix Structural Motif In Human Apolipoprotein A-I                                         | 6.27E-08 | 0.94  | 10.1  | 23.9     | 5142  | 157831262 | 1 (1 0 0 0 0)   |
| sperm activating protein subunit I, apolipoprotein A1, SPAP subunit I (Human apoA-1 fragment)                         | 1.88E-03 | 0.85  | 10.2  | 50.0     | 2930  | 235865    | 2 (2 0 0 0 0)   |
